# Supplementary material for: Growth of molybdate nanorods through an intermediate sustained release process
Source: Royal Society of Chemistry journal article supplement (doi:10.1039/c0ce00846j), 2011-01-01
Supplement: c0ce00846j.pdf [file c0ce00846j.pdf]

## Electronic supplementary information

### Growth of Molybdate Nanorods through Intermediate Sustained Release Process

Bin Hu, Xu Kang, Wen Chen,\* Fan Yang and Shan Hu

†State Key Laboratory of Advanced Technology for Materials Synthesis and Processing, School of Materials Science and Engineering, Wuhan University of Technology, Wuhan, 430070, China.

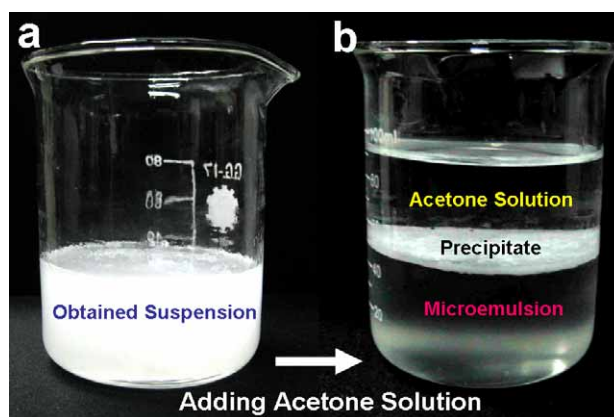

**Figure S1.** The photo of the precipitation extracting process: (a) before and (b) after adding the acetone solution.

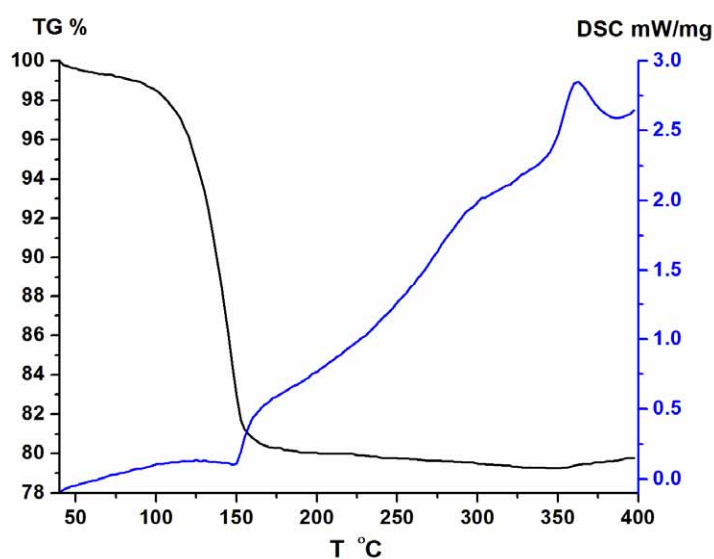

**Figure S2.** TGA-DSC curves of SZMO nanorods shows the nanorod-SDS binding is stable, and do not have structural or component variation even the samples were heated up to 100 °C

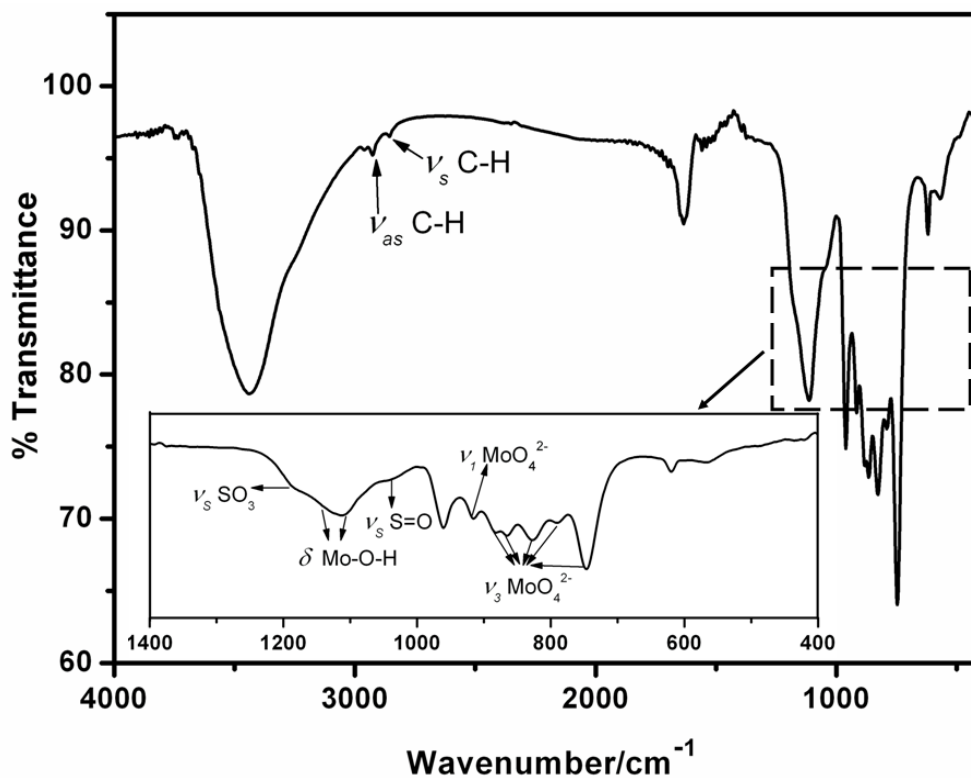

Figure S3. FTIR of SDS decorated SZMO nanorods (insert is the enlarged image from 400  $\text{cm}^{-1}$  to 1400  $\text{cm}^{-1}$  of FTIR).

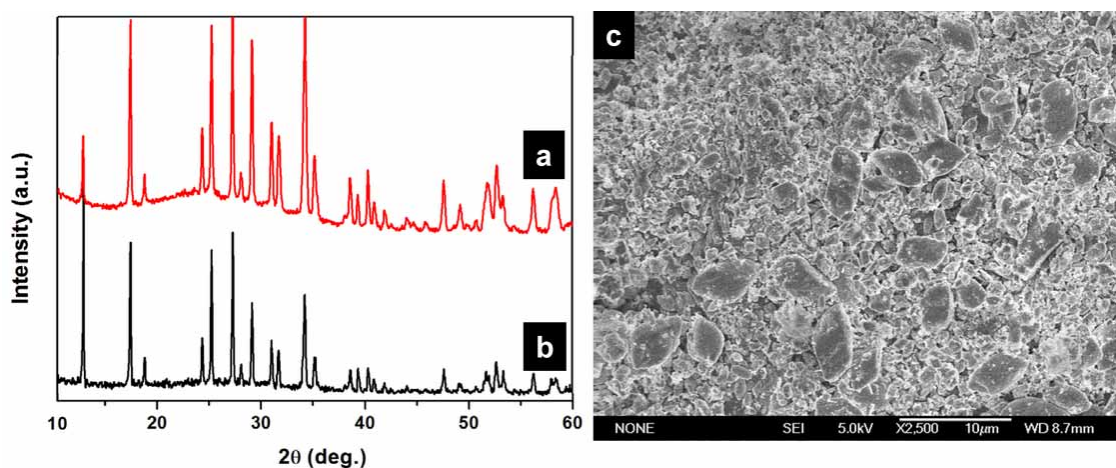

Figure S4. XRD patterns of (a) as-synthesized primary product prepared by non-acidified  $\text{ZnCl}_2$  solution as the reactant, and (b) after 5 hours aging at 120  $^\circ\text{C}$  in autoclave with its (c) low magnification SEM image.
